# Supplementary figures and images for: Metabolic Changes during In Vivo Maturation of PSC-Derived Skeletal Myogenic Progenitors
Source: MDPI journal article supplement (doi:10.3390/cells13010076), 2023-12-29

**Figure S1**

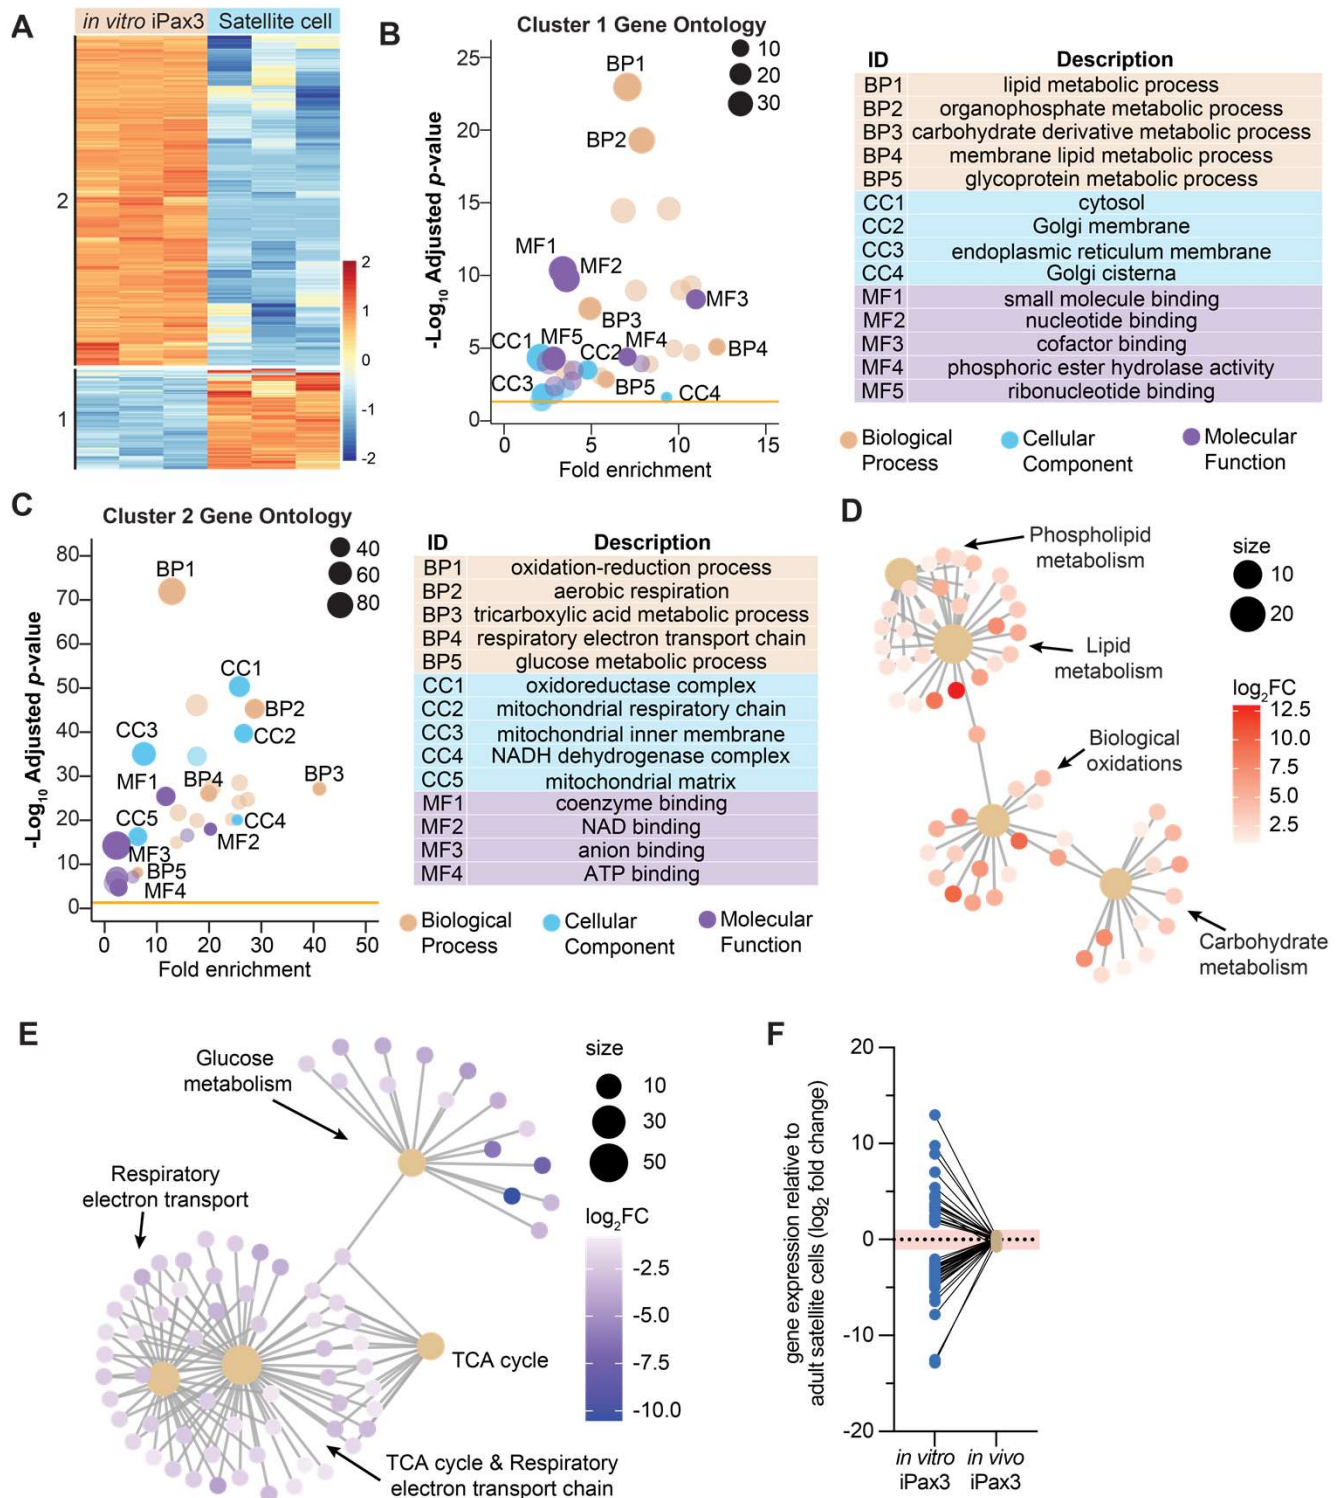

**Figure S2**

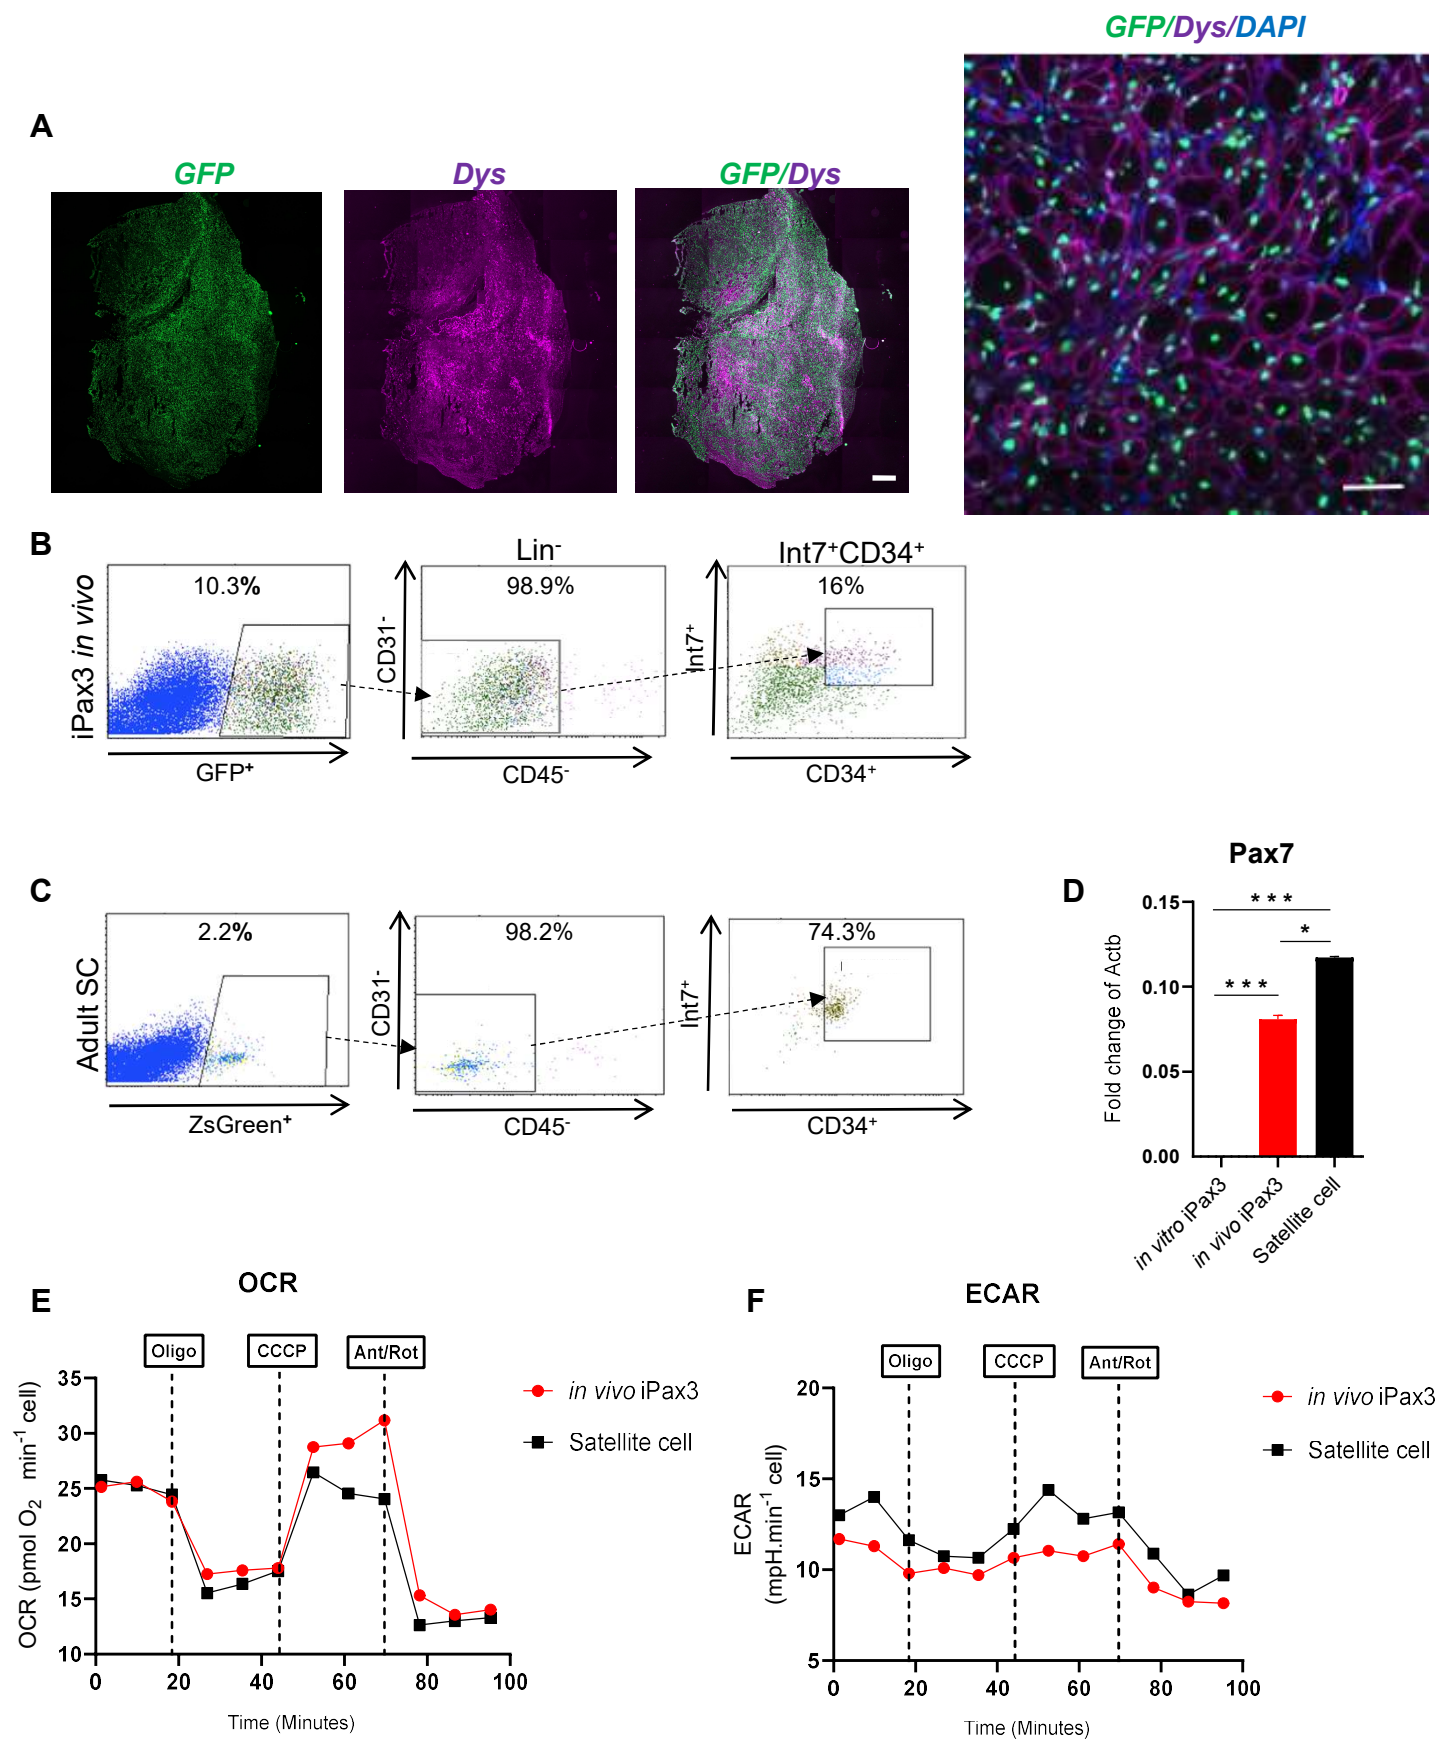

Figure S3

A

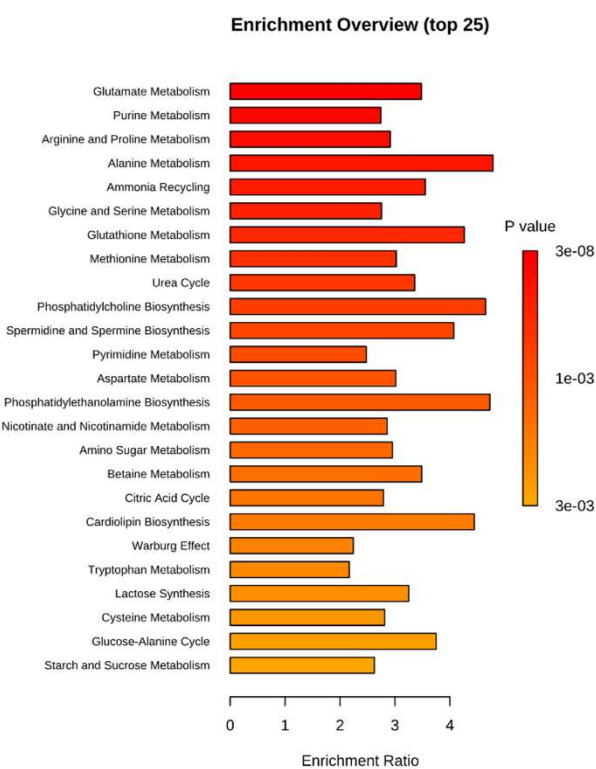

B

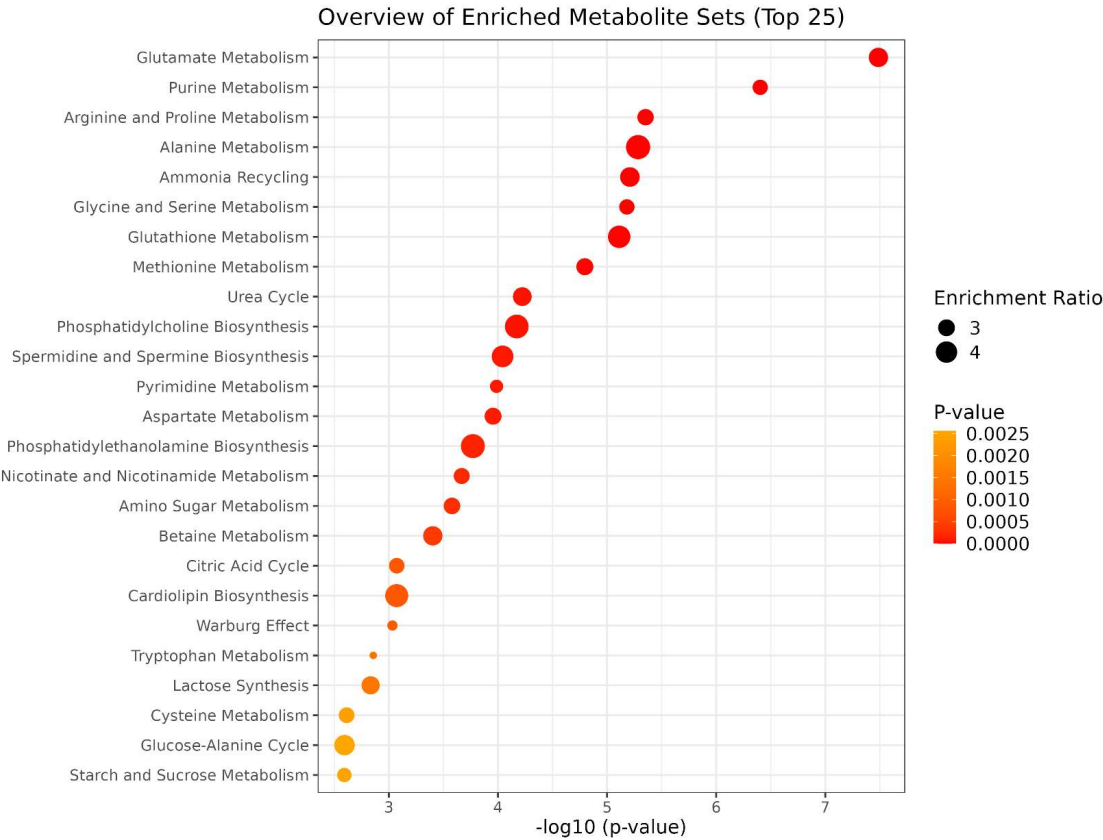

Supplement: s1 [file s1]
